# Supplementary material for: Electrochemical corrosion behavior and mechanism of iron-oxidizing bacteria Thiobacillus ferrooxidans from acid mine drainage on Q235 carbon steel
Source: Royal Society of Chemistry journal article supplement (doi:10.1039/d2nj04013a), 2022-01-01
Supplement: d2nj04013a1.pdf [file d2nj04013a1.pdf]

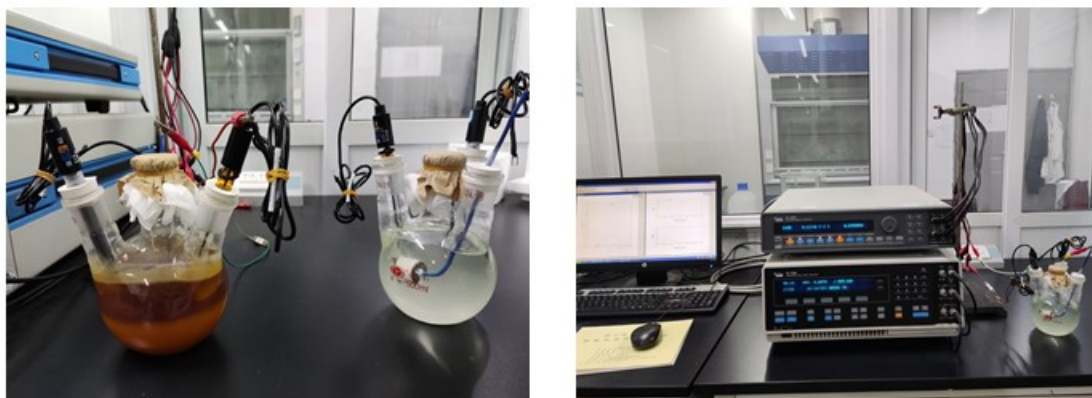

Fig. S1 The testing device of three-electrode system

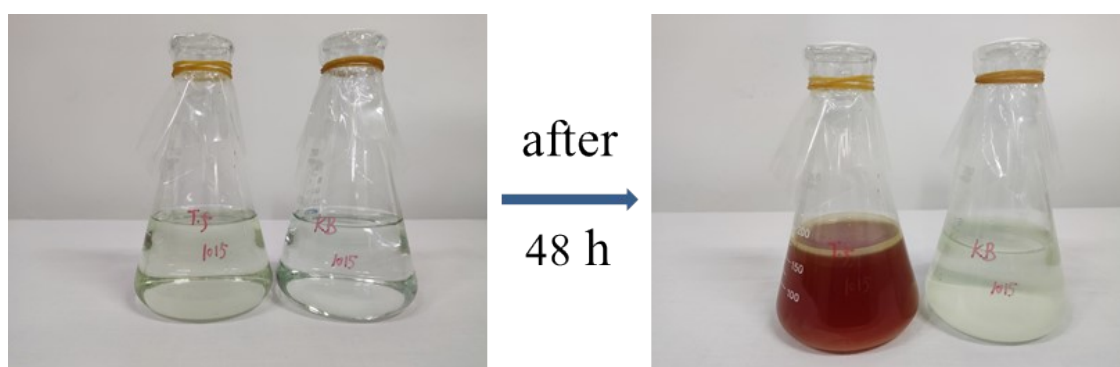

Fig. S2 Appearance color after 48h of culture in 9K medium in two groups

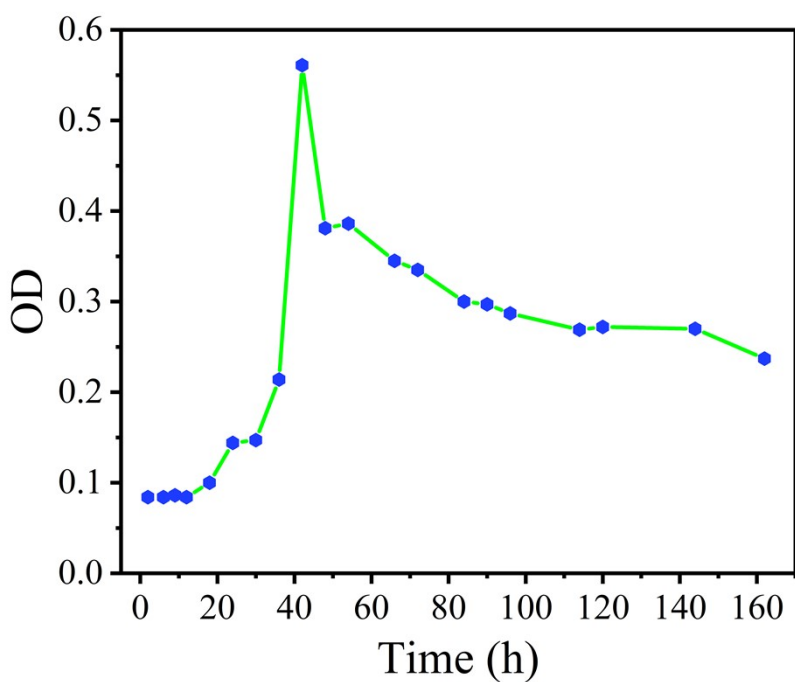

Fig. S3 The OD values of *T. ferrooxidans* from 0-180 h

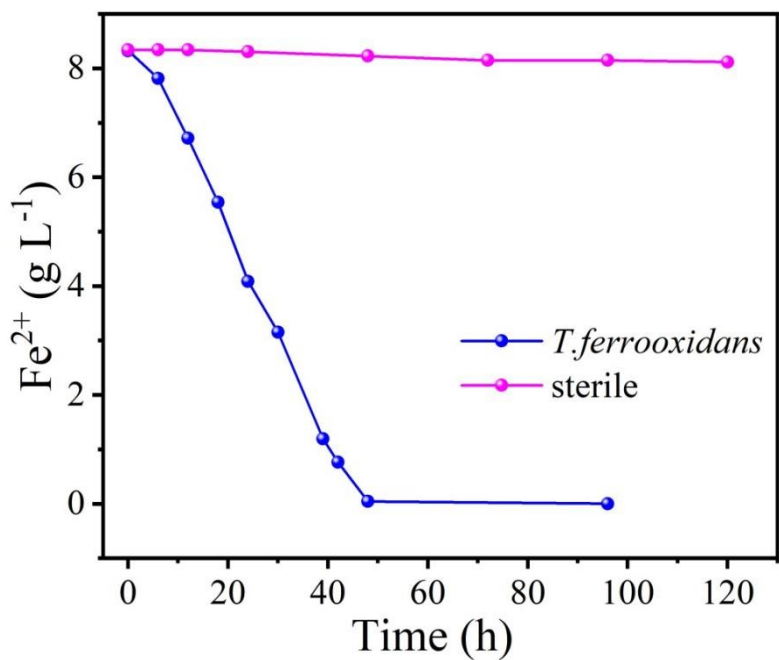

Fig. S4 The concentration of Fe<sup>2+</sup> in *T.ferrooxidans* group and sterile group at different time

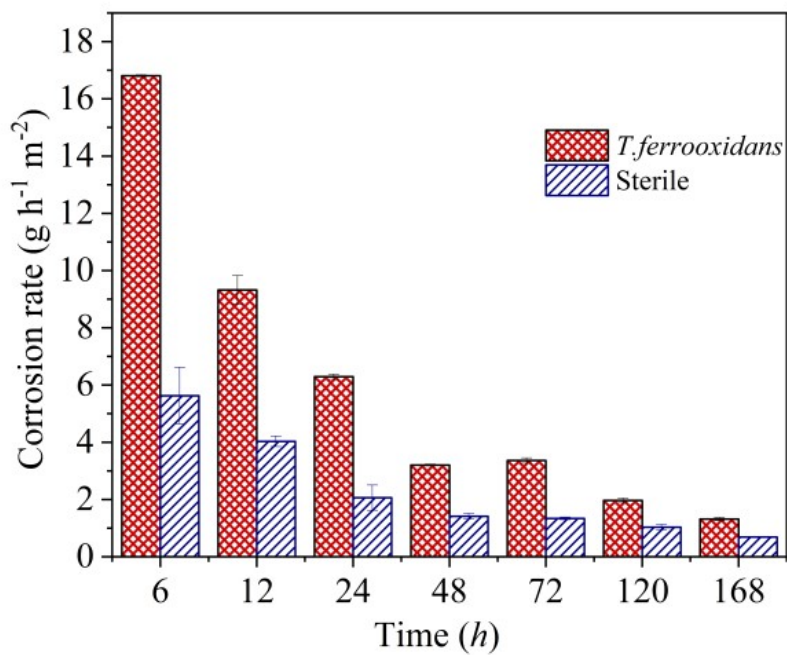

Fig.S5 Corrosion rates of Q235 immersed in sterile medium and *T.ferrooxidans* medium for different periods

Table S1 Composition of Q235 carbon steel (wt%)

| Elements | C    | Si   | Mn   | P    | S    | Al   | Ni  | Fe      |
|----------|------|------|------|------|------|------|-----|---------|
| Content  | 0.15 | 0.11 | 0.26 | 0.12 | 0.12 | 0.25 | 0.1 | balance |

Table S2 The primers used for PCR

| Primers | Sequences (5'-3')             | Size(bp) |
|---------|-------------------------------|----------|
| 27F     | AGA GTT TGA TCC TGG CTC AG    | 20       |
| 1492R   | TAC GGC TAC CTT GTT ACG ACT T | 22       |

Table S3 The 16S rRNA sequence of experimental bacteria

| 16S rRNA sequence (5'-3')                                                                                                                                                                                                                                                                                                                                                                                                                                                                                                                                                                                                                                                                                                                                                                                                                                      |
|----------------------------------------------------------------------------------------------------------------------------------------------------------------------------------------------------------------------------------------------------------------------------------------------------------------------------------------------------------------------------------------------------------------------------------------------------------------------------------------------------------------------------------------------------------------------------------------------------------------------------------------------------------------------------------------------------------------------------------------------------------------------------------------------------------------------------------------------------------------|
| ACGAGTGGCGGACGGGTGAGTAATGCGTAGGAATCTGTCTTTTAGTGGGGGACAACC<br>CAGGGAAACTTGGGCTAATACCGCATGAGCCCTGAGGGGGAAAGCGGGGGATCTTCG<br>GACCTCGCGCTAAGGGAAGAGCCTACGTCTGATTAGCTAGTTGGTAGGGTAAAGGCC<br>TACCAAGGCGACGATCAGTAGCTGGTCTGAGAGGACGACCAGCCACACTGGGACTGA<br>GACACGGCCCAGACTCCTACGGGAGGCAGCAGTGGGGAATTTTCGCAATGGGGGCA<br>ACCCTGACGAAGCAATGCCGCGTGGATGAAGAAGGCCTTCGGGTTGTAAAGTCCTTT<br>CGTGGGGGACGAAAAGGCGGGTCCTAATACGATCTGCTGTTGACGTGAACCAAGAA<br>GAAGCACCGGCTAACTCCGTGCCAGCAGCCGCGGTAATACGGGTGGTGC AAGCGTTA<br>ATCGGAATCACTGGGCGTAAAGGGTGCGTAGGCGGTACGTTAGGTCTGTCGTGAAAT<br>CCCCGGGCTCAACCTGGGAATGGCGGTAGAAACCGGCGCACTAGAGTATGGGAGAG<br>GGTGGTGAATTCAGGTGTAGCGGTGAAATGCGTAGAGATCTGGAGGAACATCAGT<br>GCGAAGGCGGCCACCTGGCCCAATACTGACGCTGAGGCACGAAAGCGTGGGGAGC<br>AACAGGATTAGATACCCTGGTAGTCCACGCCCTAAACGATGAATACTAGATGTTTG<br>GTACCTAGCGTACTGAGTGTCTGCTAGCTAACGCGATAAGTATT |
